# Supplementary material
Source: MDPI journal article supplement (https://www.mdpi.com/2073-4433/13/7/1031)
Supplement: s1 [file s1]

Supplementary material

# Three-Dimensional Dynamic Variations of Ground/Air Surface Temperatures and Their Correlation with Large-Scale Circulation Indexes in Southwest China (1980–2019)

Jin Hanyu, Cheng Qingping and Wang Ping

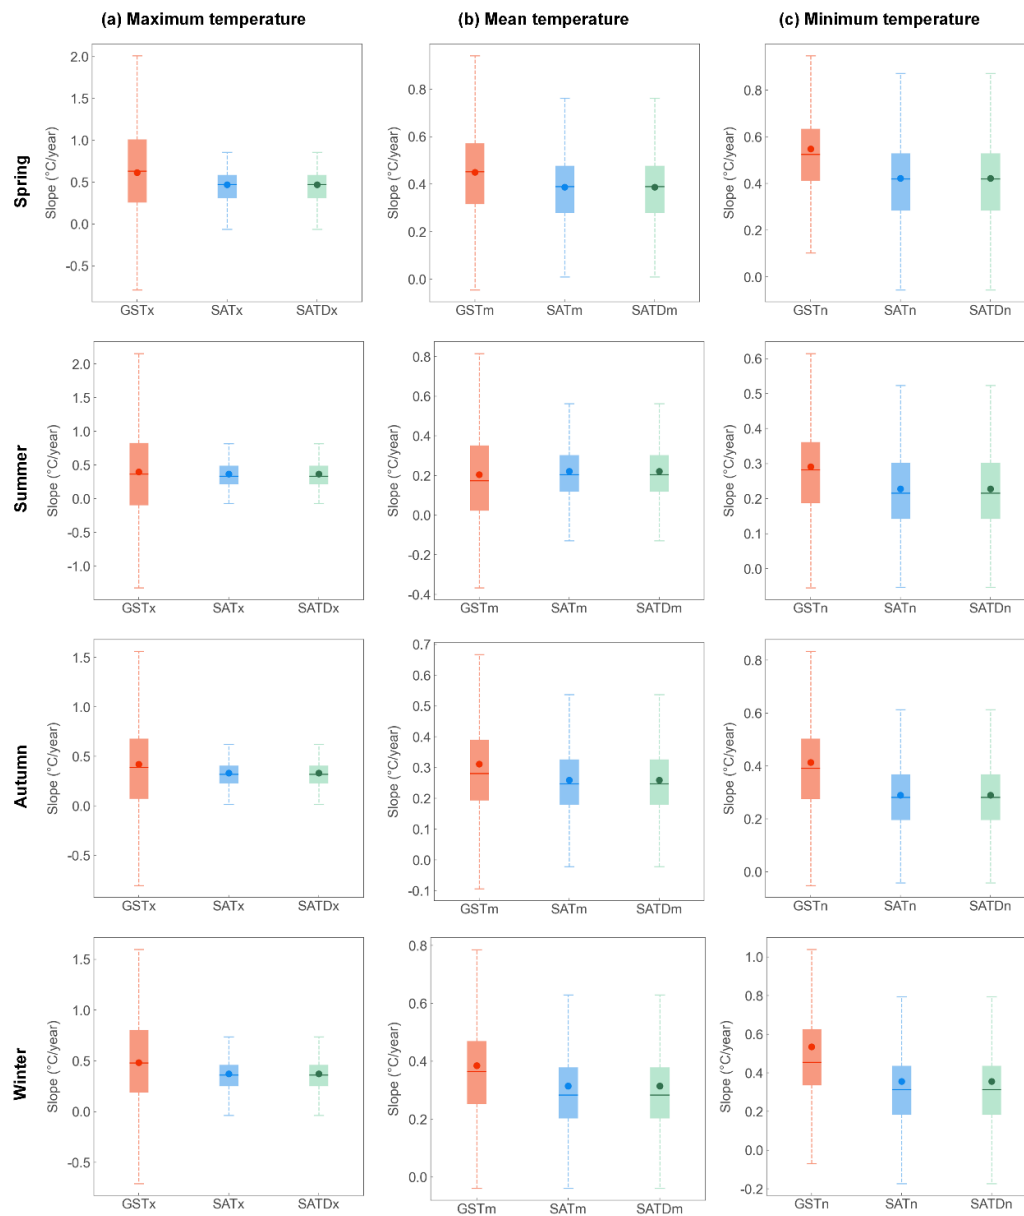

**Figure S1.** Box-and-whisker plots of trends in seasonal averaged GST-, SAT-, and SATD-related indexes 1980–2019 in Southwest China. In boxplot, horizontal line represents median, and circle represent average.

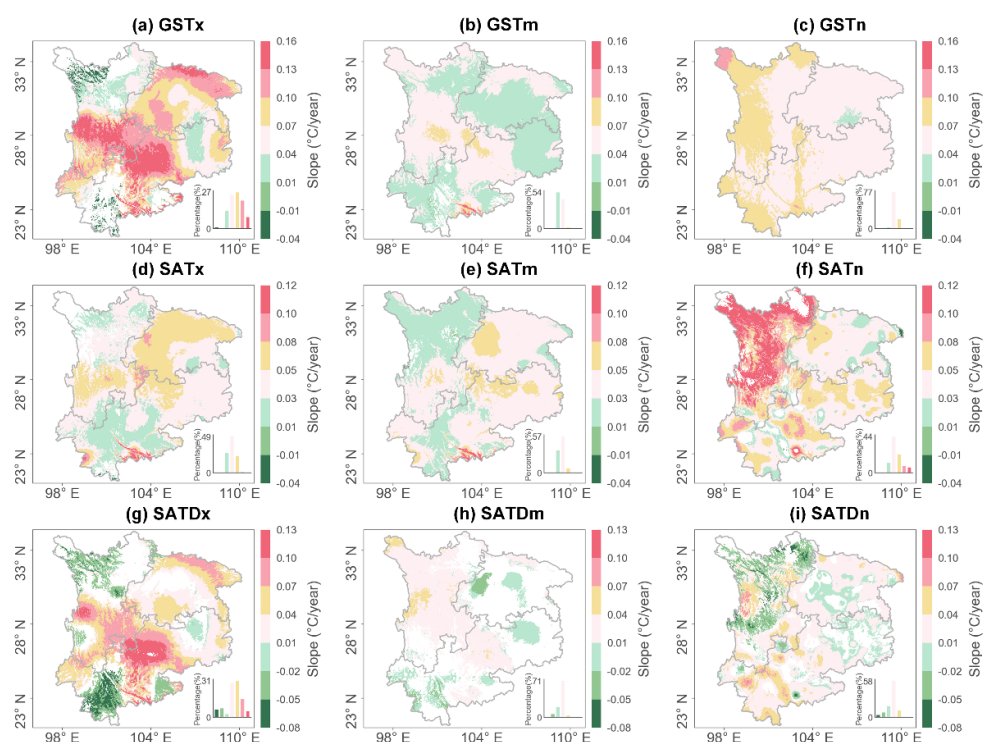

**Figure S2.** Significant variation rate of spring averaged GST-, SAT-, and SATD-related indexes for each pixel during 1980 to 2019 in Southwest China.(Significance test by MMK trend mehod at the 0.05 confidence level).

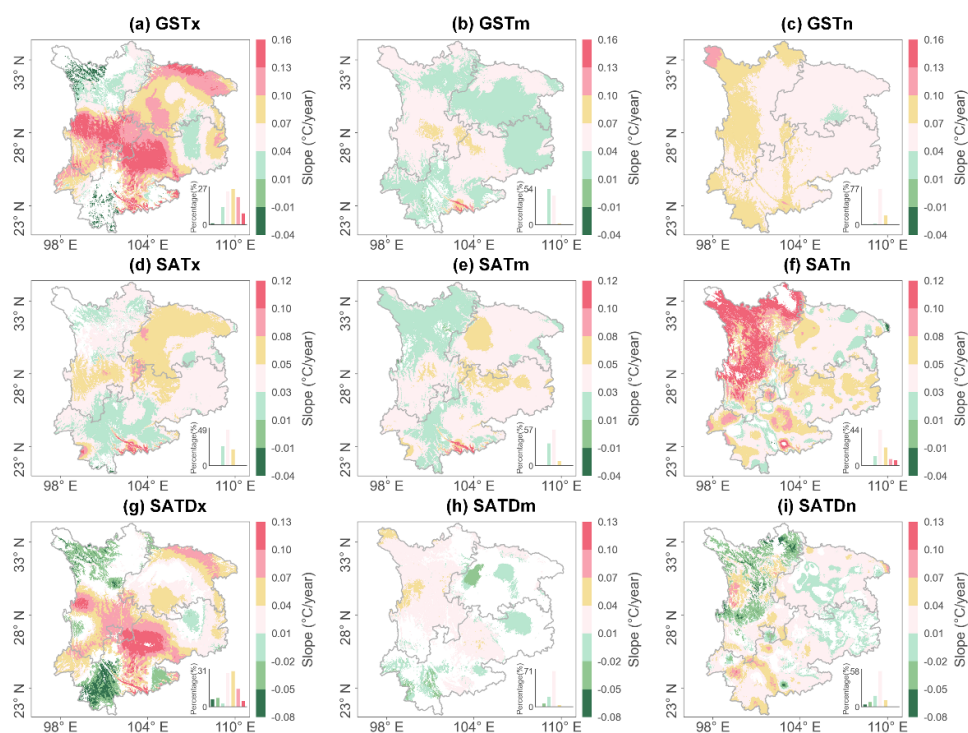

**Figure S3.** Significant variation rate of summer averaged GST-, SAT-, and SATD-related indexes for each pixel during 1980 to 2019 in Southwest China.(Significance test by MMK trend mehod at the 0.05 confidence level).

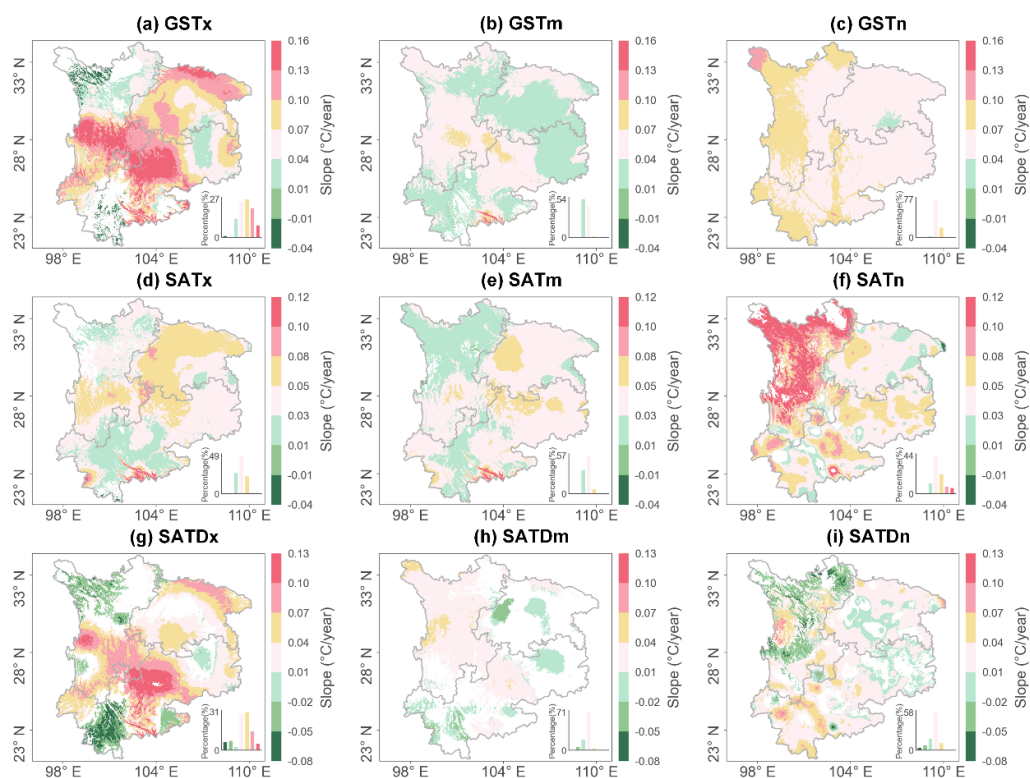

**Figure S4.** Significant variation rate of autumn averaged GST-, SAT-, and SATD-related indexes for each pixel during 1980 to 2019 in Southwest China.(Significance test by MMK trend mehod at the 0.05 confidence level).



**Figure S5.** Significant variation rate of winter averaged GST-, SAT-, and SATD-related indexes for each pixel during 1980 to 2019 in Southwest China.(Significance test by MMK trend mehod at the 0.05 confidence level).

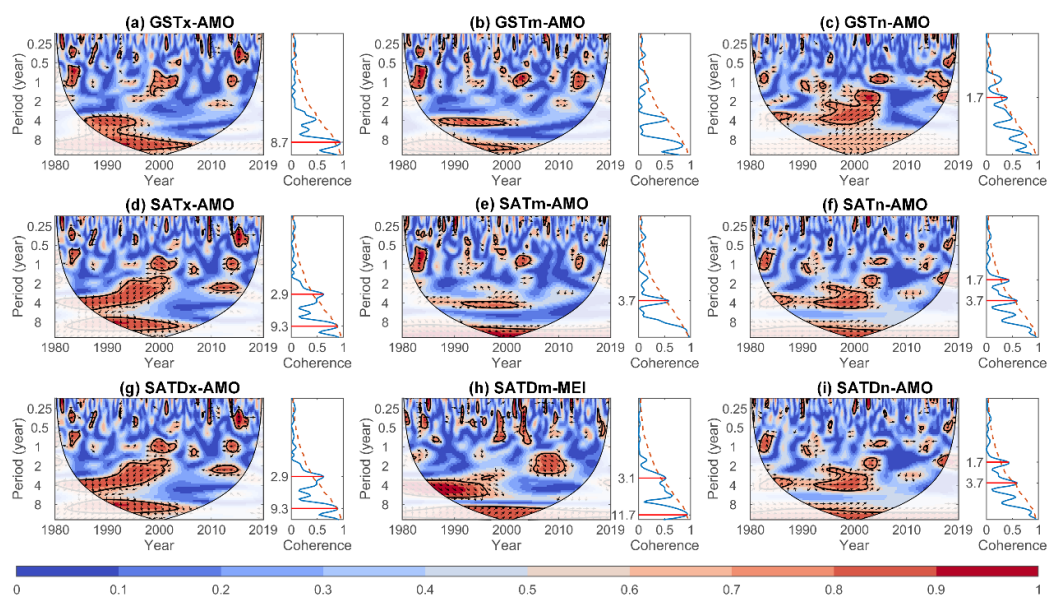

**Figure S6.** Wavelet and global coherence of anomaly of the monthly averaged GST-, SAT-, and SATD-related indexes with the highest PASC large-scale index from 1980 to 2019 in HDM.

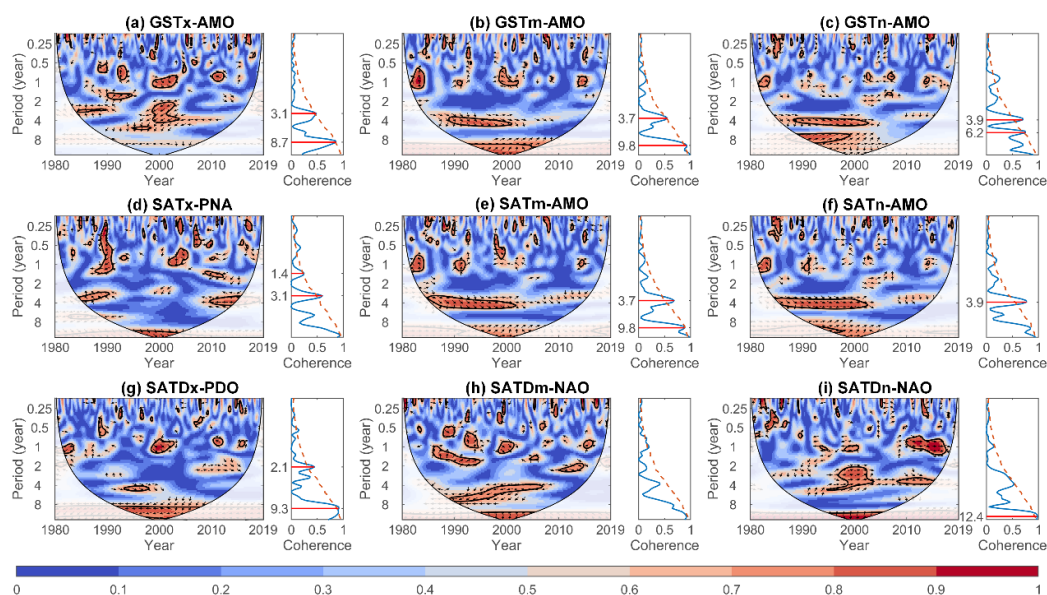

**Figure S7.** Wavelet and global coherence of anomaly of the monthly averaged GST-, SAT-, and SATD-related indexes with the highest PASC large-scale index from 1980 to 2019 in YGP.



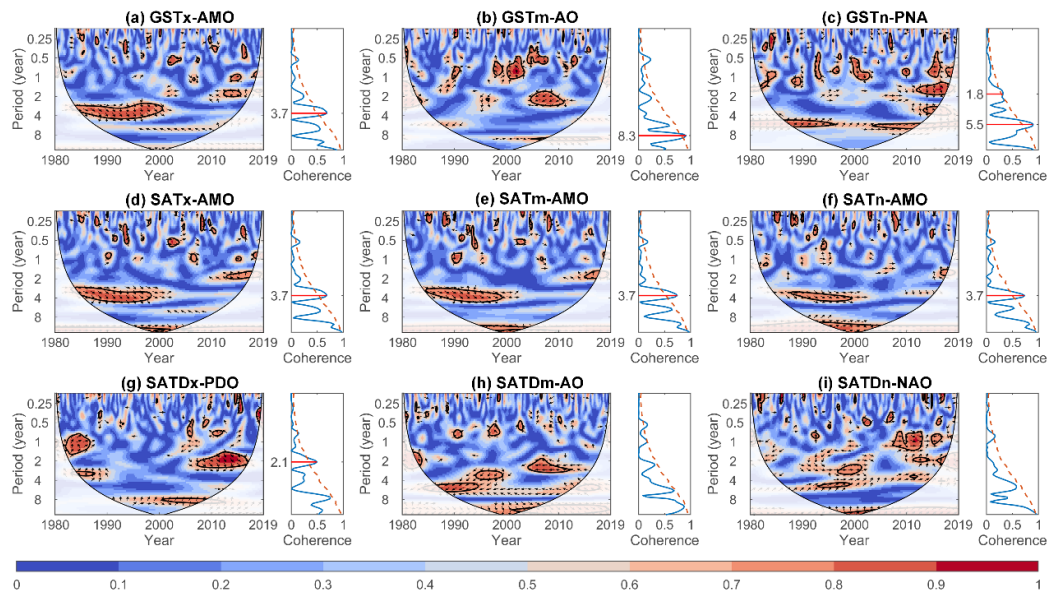

**Figure S8.** Wavelet and global coherence of anomaly of the monthly averaged GST-, SAT-, and SATD-related indexes with the highest PASC large-scale index from 1980 to 2019 in SCB.

**Table S1.** Variation rate of annual/seasonal averaged GST-, SAT-, and SATD- related indexes in three subareas (HDM/YGP/SCB, respectively).

|       | Annual                                                     | Spring                                                     | Summer                                                     | Autumn                                                     | Winter                                                     |
|-------|------------------------------------------------------------|------------------------------------------------------------|------------------------------------------------------------|------------------------------------------------------------|------------------------------------------------------------|
| GSTx  | 0.039 <sup>b</sup> /0.036 <sup>b</sup> /0.058 <sup>b</sup> | 0.062 <sup>b</sup> /0.062 <sup>b</sup> /0.074 <sup>b</sup> | 0.031 <sup>b</sup> /0.015/0.076 <sup>b</sup>               | 0.038 <sup>b</sup> /0.048 <sup>b</sup> /0.031 <sup>b</sup> | 0.041 <sup>b</sup> /0.03 <sup>b</sup> /0.058 <sup>b</sup>  |
| GSTm  | 0.038 <sup>b</sup> /0.032 <sup>b</sup> /0.033 <sup>b</sup> | 0.048 <sup>b</sup> /0.048 <sup>b</sup> /0.044 <sup>b</sup> | 0.023 <sup>b</sup> /0.011 <sup>b</sup> /0.028 <sup>b</sup> | 0.038 <sup>b</sup> /0.032 <sup>b</sup> /0.023 <sup>b</sup> | 0.049 <sup>b</sup> /0.036 <sup>b</sup> /0.031 <sup>b</sup> |
| GSTn  | 0.06 <sup>b</sup> /0.046 <sup>b</sup> /0.035 <sup>b</sup>  | 0.065 <sup>b</sup> /0.058 <sup>b</sup> /0.048 <sup>b</sup> | 0.04 <sup>b</sup> /0.028 <sup>b</sup> /0.027 <sup>b</sup>  | 0.058 <sup>b</sup> /0.041 <sup>b</sup> /0.037 <sup>b</sup> | 0.081 <sup>b</sup> /0.057 <sup>b</sup> /0.034 <sup>b</sup> |
| SATx  | 0.044 <sup>b</sup> /0.033 <sup>b</sup> /0.043 <sup>b</sup> | 0.044 <sup>b</sup> /0.045 <sup>b</sup> /0.059 <sup>b</sup> | 0.036 <sup>b</sup> /0.025 <sup>b</sup> /0.05 <sup>b</sup>  | 0.045 <sup>b</sup> /0.035 <sup>b</sup> /0.025 <sup>b</sup> | 0.053 <sup>b</sup> /0.035 <sup>b</sup> /0.031 <sup>b</sup> |
| SATm  | 0.032 <sup>b</sup> /0.029 <sup>b</sup> /0.028 <sup>b</sup> | 0.037 <sup>b</sup> /0.042 <sup>b</sup> /0.042 <sup>b</sup> | 0.025 <sup>b</sup> /0.017 <sup>b</sup> /0.028 <sup>b</sup> | 0.033 <sup>b</sup> /0.027 <sup>b</sup> /0.019 <sup>b</sup> | 0.036 <sup>b</sup> /0.037 <sup>b</sup> /0.021 <sup>b</sup> |
| SATn  | 0.034 <sup>b</sup> /0.035 <sup>b</sup> /0.026 <sup>b</sup> | 0.037 <sup>b</sup> /0.048 <sup>b</sup> /0.04 <sup>b</sup>  | 0.027 <sup>b</sup> /0.021 <sup>b</sup> /0.024 <sup>b</sup> | 0.033 <sup>b</sup> /0.033 <sup>b</sup> /0.023 <sup>b</sup> | 0.036 <sup>b</sup> /0.045 <sup>b</sup> /0.023 <sup>b</sup> |
| SATDx | -0.006/0.001/0.02 <sup>b</sup>                             | 0.015/0.021 <sup>a</sup> /0.021                            | -0.005/-0.013/0.029 <sup>b</sup>                           | -0.007/0.015 <sup>b</sup> /0.007 <sup>a</sup>              | -0.009 <sup>a</sup> /-0.003/0.023 <sup>b</sup>             |
| SATDm | 0.006 <sup>b</sup> /0.002/0.005 <sup>b</sup>               | 0.015 <sup>b</sup> /0.009 <sup>b</sup> /0.003              | 0/-0.005 <sup>b</sup> /0.002                               | 0.004 <sup>a</sup> /0.005 <sup>b</sup> /0.005 <sup>b</sup> | 0.012 <sup>b</sup> /0.003 <sup>b</sup> /0.009 <sup>b</sup> |
| SATDn | 0.024 <sup>b</sup> /0.01 <sup>b</sup> /0.01 <sup>b</sup>   | 0.026 <sup>b</sup> /0.011 <sup>b</sup> /0.01 <sup>b</sup>  | 0.013 <sup>b</sup> /0.006 <sup>b</sup> /0.004 <sup>a</sup> | 0.024 <sup>b</sup> /0.009 <sup>b</sup> /0.012 <sup>b</sup> | 0.039 <sup>b</sup> /0.014 <sup>b</sup> /0.013 <sup>b</sup> |

**Table S2.** The climate jump of annual/seasonal averaged GST, SAT and SATD related indexes in three subareas (HDM/YGP/SCB, respectively).

|       | Annual         | Spring         | Summer         | Autumn         | Winter         |
|-------|----------------|----------------|----------------|----------------|----------------|
| GSTx  | 2001/-/-       | -/-/-          | -/-/-          | -/-/-          | -/-/-          |
| GSTm  | 2001/2001/1996 | 2002/-/1996    | -/-/-          | 1997/-/-       | -/-/-          |
| GSTn  | 2003/2003/2003 | 2003/2003/1996 | 2002/2004/2004 | 2004/-/2003    | 2003/-/-       |
| SATx  | 2001/1997/1996 | -/-/1996       | 2004/-/-       | -/-/-          | -/-/-          |
| SATm  | 2002/1997/1996 | -/-/1996       | 2004/2004/-    | 1997/-/-       | -/-/-          |
| SATn  | 2004/1997/1997 | -/1997/1996    | 2004/2004/-    | -/-/-          | -/-/-          |
| SATDx | -/-/-          | -/-/-          | -/-/2010       | -/-/-          | -/-/-          |
| SATDm | 2001/-/-       | 2002/-/-       | -/-/-          | 2001/-/1997    | 2002/2002/2005 |
| SATDn | 2003/2003/2003 | 2003/2003/2004 | 2003/2003/2003 | 2003/2003/2003 | 2003/2003/2003 |

**Table S3.** Period, variance contribution rate of monthly averaged GST, SAT, and SATD related indexes in three subareas from 1980 to 2019.

| Period (year) |       |             |       |       |       |       |       |       |             | Contribution (%) |       |       |       |       |       |       |       |       |
|---------------|-------|-------------|-------|-------|-------|-------|-------|-------|-------------|------------------|-------|-------|-------|-------|-------|-------|-------|-------|
| Subar         | GST   | GST         | GST   | SAT   | SAT   | SAT   | SATD  | SATD  | SATD        | GST              | GST   | GST   | SAT   | SAT   | SAT   | SATD  | SATD  | SATD  |
| ea            | x     | m           | n     | x     | m     | n     | x     | m     | n           | x                | m     | n     | x     | m     | n     | x     | m     | n     |
| HDM           | 0.31  | 0.24        | 0.25  | 0.37  | 0.48  | 0.25  | 0.48  | 0.27  | 0.25        | 7.01             | 43.38 | 13.92 | 10.48 | 16.21 | 4.63  | 14.77 | 6.28  | 24.57 |
|               | 0.98  | <b>0.46</b> | 0.85  | 0.98  | 0.98  | 0.98  | 0.98  | 0.98  | <b>0.66</b> | 92.52            | 20.13 | 77.66 | 89.1  | 83.49 | 93.72 | 84.96 | 90.52 | 55.19 |
|               | 1.54  | 0.87        | 1.18  | 1.82  | 1.67  | 1.54  | 1.9   | 1.67  | 1.05        | 0.22             | 8.59  | 6.26  | 0.2   | 0.12  | 0.9   | 0.16  | 0.82  | 16.36 |
|               | 3.98  | 2.13        | 3.03  | 3.93  | 3.93  | 3.67  | 4.08  | 4.33  | 2.74        | 0.12             | 5.88  | 1.04  | 0.14  | 0.05  | 0.46  | 0.06  | 0.45  | 1.27  |
|               | 9.4   | 5.38        | 5.18  | 7.77  | 8.35  | 7.27  | 7.41  | 8.49  | 5.24        | 0.05             | 5.72  | 0.48  | 0.04  | 0.04  | 0.16  | 0.03  | 0.33  | 0.99  |
|               | 19.78 | 17.45       | 10.72 | 20.88 | 20.53 | 21.16 | 18.58 | 24.33 | 11.8        | 0.07             | 13.64 | 0.32  | 0.02  | 0.08  | 0.07  | 0.02  | 1.48  | 0.53  |
| YGP           | 0.29  | 0.24        | 0.26  | 0.29  | 0.41  | 0.28  | 0.36  | 0.24  | 0.25        | 5.76             | 54.28 | 11.1  | 8.03  | 13.33 | 5.32  | 12.39 | 14.39 | 35.63 |
|               | 0.98  | <b>0.45</b> | 0.83  | 0.98  | 0.98  | 0.98  | 0.98  | 0.91  | <b>0.63</b> | 93.58            | 17.77 | 81.2  | 91.43 | 86.34 | 93.49 | 87.2  | 76.34 | 46.53 |
|               | 1.6   | 0.89        | 1.14  | 1.74  | 1.9   | 1.54  | 1.82  | 1.14  | 1.03        | 0.4              | 13.03 | 6.36  | 0.29  | 0.19  | 0.74  | 0.23  | 5.24  | 13.56 |
|               | 4.04  | 2.02        | 3.02  | 4.02  | 4.01  | 4.01  | 3.97  | 3.03  | 2.42        | 0.19             | 7.11  | 0.72  | 0.19  | 0.08  | 0.35  | 0.13  | 0.73  | 1.9   |
|               | 8.58  | 4.01        | 4.72  | 7.78  | 8.42  | 7.52  | 6.86  | 6.51  | 5.05        | 0.02             | 3.36  | 0.37  | 0.04  | 0.04  | 0.06  | 0.03  | 1.25  | 1.01  |
|               | 19.56 | 23.57       | 11.91 | 14.47 | 17.54 | 10.53 | 15.74 | 11.62 | 9.23        | 0.05             | 2.78  | 0.2   | 0.02  | 0.01  | 0.03  | 0.02  | 0.91  | 0.6   |
| SCB           | 0.31  | 0.24        | 0.25  | 0.34  | 0.48  | 0.27  | 0.4   | 0.24  | 0.25        | 10.4             | 55.05 | 6.28  | 12.66 | 20.51 | 7.24  | 17.5  | 15.74 | 18.06 |
|               | 0.98  | <b>0.48</b> | 0.98  | 0.98  | 0.98  | 0.98  | 0.98  | 0.83  | <b>0.78</b> | 89.01            | 20.83 | 92.12 | 86.82 | 79.12 | 92.07 | 82.09 | 72.32 | 70.25 |
|               | 1.82  | 0.87        | 1.54  | 1.82  | 2     | 1.82  | 1.9   | 1.18  | 1.11        | 0.32             | 8.71  | 1.01  | 0.25  | 0.16  | 0.35  | 0.21  | 6.78  | 9.08  |
|               | 4.05  | 1.85        | 4.28  | 4.07  | 4.07  | 4.06  | 4.08  | 2.7   | 2.82        | 0.2              | 5.65  | 0.43  | 0.2   | 0.1   | 0.24  | 0.13  | 0.89  | 1.53  |
|               | 7.52  | 4.69        | 7.06  | 7.41  | 9.79  | 7.92  | 9.6   | 6.86  | 5.51        | 0.06             | 3.35  | 0.08  | 0.06  | 0.06  | 0.09  | 0.05  | 1.45  | 0.87  |
|               | 14.34 | 8.87        | 14.11 | 13.78 | 21.02 | 13.42 | 17.95 | 19.86 | 10.45       | 0.01             | 3.05  | 0.06  | 0.01  | 0.03  | 0.01  | 0.01  | 1.75  | 0.1   |

**Table S4.** Percentage of significant ( $p \leq 0.05$ ) increasing/decreasing stations of GST-, SAT-, and SATD-related indexes in three subareas during 1980 to 2019.

|      | HDM             |                 |                 |                 |                 | YGP             |                 |                 |                 |                 | SCB             |                 |                 |                 |                |
|------|-----------------|-----------------|-----------------|-----------------|-----------------|-----------------|-----------------|-----------------|-----------------|-----------------|-----------------|-----------------|-----------------|-----------------|----------------|
|      | Annual          | Spring          | Summer          | Autumn          | Winter          | Annual          | Spring          | Summer          | Autumn          | Winter          | Annual          | Spring          | Summer          | Autumn          | Winter         |
| GSTx | 61.19/1<br>6.42 | 58.21/1<br>3.43 | 46.27/2<br>8.36 | 49.25/1<br>3.43 | 64.18/8<br>.96  | 63.19/1<br>0.44 | 63.19/1<br>0.99 | 34.07/2<br>0.88 | 60.44/9<br>.34  | 58.24/9<br>89   | 83.19/0<br>.84  | 84.03/2<br>.52  | 73.95/4<br>.2   | 63.87/5<br>.04  | 91.6/0.<br>84  |
| GSTm | 91.04/0<br>.0   | 88.06/4<br>.48  | 70.15/7<br>.46  | 91.04/0<br>.0   | 95.52/1<br>.49  | 89.56/2<br>.2   | 89.56/3<br>.3   | 46.15/1<br>3.74 | 86.26/2<br>.2   | 90.66/0<br>55   | 92.44/1<br>.68  | 94.12/1<br>.68  | 84.03/3<br>.36  | 86.55/0<br>.84  | 90.76/<br>0.84 |
| GSTn | 94.03/0<br>.0   | 94.03/0<br>.0   | 95.52/0<br>.0   | 95.52/0<br>.0   | 91.04/1<br>.49  | 98.35/0<br>.0   | 98.35/0<br>.0   | 90.66/1<br>.1   | 91.21/1<br>.1   | 98.35/0<br>0    | 97.48/0<br>.84  | 97.48/0<br>.84  | 91.6/1<br>68    | 94.96/1<br>.68  | 97.48/<br>0.84 |
| SATx | 98.51/0<br>.0   | 95.52/0<br>.0   | 98.51/0<br>.0   | 98.51/0<br>.0   | 97.01/0<br>.0   | 97.8/1<br>65    | 91.21/0<br>.0   | 89.56/1<br>.65  | 94.51/1<br>.65  | 190.66/1<br>1   | 94.12/0<br>.0   | 96.64/0<br>.0   | 94.96/0<br>.84  | 81.51/0<br>.0   | 92.44/<br>1.68 |
| SATm | 98.51/0<br>.0   | 95.52/0<br>.0   | 91.04/0<br>.0   | 95.52/0<br>.0   | 95.52/0<br>.0   | 96.15/1<br>.65  | 95.05/0<br>.0   | 83.52/1<br>.65  | 95.6/1<br>65    | 93.41/1<br>1    | 93.28/0<br>.0   | 94.12/0<br>.0   | 92.44/1<br>.68  | 84.03/0<br>.0   | 87.39/<br>1.68 |
| SATn | 95.52/1<br>.49  | 95.52/1<br>.49  | 94.03/0<br>.0   | 95.52/1<br>.49  | 94.03/1<br>.49  | 96.15/1<br>.1   | 95.6/0<br>55    | 90.11/1<br>.65  | 93.96/1<br>.65  | 196.15/0<br>55  | 92.44/1<br>.68  | 94.96/0<br>.0   | 88.24/3<br>.36  | 90.76/1<br>.68  | 83.19/<br>1.68 |
| SATD | 28.36/2<br>x    | 37.31/2<br>9.85 | 25.37/3<br>0.9  | 29.85/3<br>8.81 | 34.33/2<br>1.34 | 38.46/2<br>3.63 | 40.11/2<br>4.18 | 18.68/3<br>4.62 | 41.76/1<br>8.68 | 35.71/2<br>9.12 | 48.74/1<br>0.92 | 38.66/1<br>2.61 | 50.42/1<br>9.33 | 41.18/1<br>8.49 | 57.98/<br>6.72 |
| SATD | 49.25/1<br>m    | 52.24/1<br>3.43 | 23.88/3<br>1.94 | 38.81/1<br>4.93 | 65.67/1<br>0.45 | 40.11/2<br>9.12 | 43.41/1<br>8.68 | 20.88/4<br>4.51 | 42.86/2<br>0.88 | 47.25/2<br>3.08 | 45.38/2<br>1.01 | 38.66/2<br>2.69 | 36.97/2<br>9.41 | 50.42/1<br>8.49 | 63.87/<br>8.4  |

|      |         |         |         |         |         |         |         |         |         |         |         |         |         |         |        |
|------|---------|---------|---------|---------|---------|---------|---------|---------|---------|---------|---------|---------|---------|---------|--------|
| SATD | 67.16/7 | 70.15/8 | 68.66/8 | 65.67/7 | 62.69/8 | 52.75/1 | 54.4/14 | 52.75/1 | 51.65/1 | 57.14/1 | 52.94/1 | 57.14/1 | 42.02/3 | 61.34/5 | 63.87/ |
| n    | .46     | .96     | .96     | .46     | .96     | 4.29    | .29     | 7.03    | 8.13    | 0.44    | 3.45    | 4.29    | 0.25    | .88     | 9.24   |

**Table S5.** Percentage of significant ( $p \leq 0.05$ ) increasing/decreasing pixels of GST-, SAT-, and SATD-related indexes in three subareas during 1980 to 2019.

|       | HDM         |            |            |             |            | YGP        |             |            |             |             | SCB        |          |         |            |            |
|-------|-------------|------------|------------|-------------|------------|------------|-------------|------------|-------------|-------------|------------|----------|---------|------------|------------|
|       | Annual      | Spring     | Summer     | Autumn      | Winter     | Annual     | Spring      | Summer     | Autumn      | Winter      | Annual     | Spring   | Summer  | Autumn     | Winter     |
| GSTx  | 74.18/4.67  | 09/4.63    | 88/56      | 56/2.40     | 93/1.77    | 92/5.73    | 74/6.46     | 22.39/66   | 67/0.46     | 15/1.97     | 47/97      | 46/0.89  | 89/0.51 | 17/0.85    | 01/2.0     |
| GSTm  | 99.99/0.98  | 81/0.69    | 0/0.79     | 1/0.07      | 1.51/0.97  | 65/0.88    | 34/0.46     | 17/100     | 0/0.98      | 91/0.100    | 0/100      | 0/99.3   | 0/90.22 | 0/99.9     | 0/98.96    |
| GSTn  | 100.0/0.100 | 0/0.100    | 0/0.100    | 0/0.100     | 0/0.99     | 99/0.100   | 0/0.100     | 0/0.100    | 0/0.100     | 0/0.100     | 0/0.100    | 0/0.100  | 0/0.100 | 0/0.100    | 0/0.100    |
| SATx  | 100.0/0.72  | 92/0.97    | 4/0.55     | 45/6.100    | 0/0.100    | 0/0.95     | 17/0.98     | 5/0.99     | 54/0.95     | 95/0.100    | 0/99.5     | 0/99.97  | 0/89.51 | 0/93.01    | 0/0.0      |
| SATm  | 100.0/0.92  | 71/0.87    | 08/27      | 48/136      | 68/0.99    | 79/0.98    | 34/0.86     | 39/99      | 26/0.96     | 92/0.99     | 8/0.99     | 82/0.98  | 71/0.92 | 83/1.83    | 71/0.0     |
| SATn  | 97.34/0.92  | 74/0.99    | 99/85      | 06/0.79     | 89/0.94    | 94/0.93    | 41/0.99     | 92/98      | 01/0.95     | 11/0.94     | 1/0.96     | 86/0.99  | 68/0.97 | 62/0.87    | 78/1.0     |
| SATDx | 29.43/3.82  | 36.0/12.76 | 18.02/6.01 | 34.16/1.018 | 10.63/0.39 | 30.42/3.34 | 57.26/1.676 | 5.71/2.059 | 24.41/1.433 | 14.27/5.671 | 60.17/6.71 | 65.33/67 | 0/61.53 | 10.24/5.51 | 22.99/4.34 |
| SATDm | 51.71/3.37  | 59.19/0.38 | 3.83/3.95  | 49/0.72     | 39/0.43    | 83/2.18    | 08/1.33     | 5/76       | 54/1.51     | 19/9.61     | 3/8.10     | 02/1.33  | 67/2.80 | 48/0.80    | 69/1.0     |
| SATDn | 87.4/0.7    | 33.23/2.97 | 71/89      | 05/0.80     | 74/0.71    | 78/1.65    | 86/3.72     | 75/69      | 75/0.68     | 19/2.78     | 76/71      | 91/3.54  | 11/4.89 | 35/0.88    | 51/0.0     |

**Table S6.** The slope of variation rate of annual and seasonal averaged GST-, SAT-, and SATD-related indexes from 1980 to 2019 with elevation in three subareas.

| Sub-region | Timescale | GSTx                | GSTm                | GSTn               | SATx                | SATm                | SATn                | SATDx               | SATDm              | SATDn              |
|------------|-----------|---------------------|---------------------|--------------------|---------------------|---------------------|---------------------|---------------------|--------------------|--------------------|
| HDM        | Annual    | -0.002              | 0.017 <sup>b</sup>  | 0.022 <sup>b</sup> | -0.001              | 0.011 <sup>b</sup>  | 0.012 <sup>b</sup>  | -0.006              | 0.006 <sup>b</sup> | 0.01 <sup>b</sup>  |
|            | Spring    | -0.009 <sup>b</sup> | 0.002 <sup>b</sup>  | 0.002 <sup>a</sup> | -0.006 <sup>b</sup> | -0.005 <sup>b</sup> | 0.007               | -0.001              | 0.012 <sup>b</sup> | 0.002              |
|            | Summer    | -0.001              | 0.006 <sup>b</sup>  | 0.008 <sup>b</sup> | 0.001               | 0.006 <sup>b</sup>  | 0.006 <sup>b</sup>  | 0.014 <sup>a</sup>  | -0.003             | 0.003 <sup>b</sup> |
|            | Autumn    | -0.001              | -0.002              | 0.024 <sup>b</sup> | -0.003              | -0.025 <sup>b</sup> | -0.002              | 0.01 <sup>b</sup>   | 0.019 <sup>b</sup> | 0.027 <sup>b</sup> |
|            | Winter    | -0.005 <sup>a</sup> | 0.003 <sup>a</sup>  | 0.029 <sup>b</sup> | 0.005 <sup>b</sup>  | -0.004 <sup>a</sup> | 0.004 <sup>b</sup>  | -0.011 <sup>b</sup> | 0.005 <sup>b</sup> | 0.03 <sup>b</sup>  |
| YGP        | Annual    | 0.007               | 0.008 <sup>a</sup>  | 0.016 <sup>b</sup> | -0.003 <sup>a</sup> | 0.004 <sup>b</sup>  | 0.003 <sup>b</sup>  | 0.011 <sup>a</sup>  | 0.0                | 0.013 <sup>b</sup> |
|            | Spring    | 0.008               | 0.0                 | 0.004 <sup>b</sup> | -0.004              | -0.01 <sup>b</sup>  | 0.002               | 0.015               | 0.005              | 0.01 <sup>b</sup>  |
|            | Summer    | -0.008              | -0.004              | 0.005 <sup>b</sup> | 0.0                 | -0.0                | 0.0                 | 0.007               | 0.004              | 0.007 <sup>b</sup> |
|            | Autumn    | -0.013 <sup>a</sup> | 0.003 <sup>b</sup>  | 0.012 <sup>b</sup> | -0.0                | -0.003              | -0.005 <sup>b</sup> | 0.011               | 0.017 <sup>b</sup> | 0.017 <sup>b</sup> |
|            | Winter    | 0.011               | 0.009 <sup>b</sup>  | 0.014 <sup>b</sup> | 0.003 <sup>a</sup>  | -0.005 <sup>a</sup> | -0.004              | -0.001              | 0.013 <sup>b</sup> | 0.019 <sup>b</sup> |
| SCB        | Annual    | -0.005 <sup>a</sup> | 0.012 <sup>b</sup>  | 0.019 <sup>b</sup> | -0.002 <sup>a</sup> | 0.012 <sup>b</sup>  | 0.01 <sup>b</sup>   | -0.016 <sup>b</sup> | 0.002              | 0.008 <sup>b</sup> |
|            | Spring    | -0.012 <sup>b</sup> | 0.002               | 0.003 <sup>b</sup> | -0.007 <sup>b</sup> | -0.006 <sup>b</sup> | 0.008 <sup>a</sup>  | -0.012 <sup>a</sup> | 0.01 <sup>b</sup>  | 0.004              |
|            | Summer    | -0.011 <sup>b</sup> | 0.0                 | 0.005 <sup>b</sup> | -0.002              | 0.002               | 0.004 <sup>b</sup>  | -0.008              | -0.005             | 0.003 <sup>b</sup> |
|            | Autumn    | 0.001               | -0.002 <sup>a</sup> | 0.019 <sup>b</sup> | -0.003 <sup>a</sup> | -0.02 <sup>b</sup>  | -0.002 <sup>b</sup> | 0.009 <sup>a</sup>  | 0.017 <sup>b</sup> | 0.022 <sup>b</sup> |

Winter    -0.007    0.003<sup>a</sup>    0.022<sup>b</sup>    0.009<sup>b</sup>    -0.006    0.0    -0.017<sup>b</sup>    0.005<sup>b</sup>    0.026<sup>b</sup>

**Table S7.** Percentage area of significant ( $p \leq 0.05$ ) coherence in bi-wavelet coherence between anomaly of the monthly averaged GST-, SAT-, and SATD-related indexes and large-scale indexes in from 1980 to 2019 in three subareas.

|     |     | GSTm         | GSTx         | GSTn        | SATm         | SATx         | SATn         | SATDx        | SATDn        | SATDm        |
|-----|-----|--------------|--------------|-------------|--------------|--------------|--------------|--------------|--------------|--------------|
| HDM | AMO | <b>9.09</b>  | <b>13.92</b> | <b>9.18</b> | <b>13.69</b> | <b>12.39</b> | <b>14.78</b> | <b>15.42</b> | <b>11.13</b> | 9.38         |
|     | AO  | 4.88         | 5.98         | 2.48        | 3.38         | 3.52         | 3.97         | 8.99         | 5.47         | 9.7          |
|     | MEI | 5.87         | 6.54         | 8.22        | 8.07         | 5.41         | 13.91        | 10.54        | 3.03         | <b>18.39</b> |
|     | NAO | 4.75         | 4.33         | 6.93        | 5.19         | 3.97         | 6.52         | 5.14         | 4.51         | 11.32        |
|     | PDO | 2.95         | 4.56         | 4.89        | 3.25         | 2.74         | 4.06         | 5.64         | 4.21         | 9.68         |
|     | PNA | 2.23         | 7.25         | 3.7         | 2.74         | 2.46         | 4.76         | 10.09        | 3.99         | 5.6          |
| SCB | AMO | <b>15.02</b> | 4.07         | <b>6.44</b> | <b>10.09</b> | 8.15         | <b>9.73</b>  | 4.01         | 8.34         | 5.18         |
|     | AO  | 4.48         | 4.92         | 3.11        | 3.8          | 3.14         | 3.65         | 4.06         | 10.85        | 6.06         |
|     | MEI | 4.03         | 5.43         | 2.41        | 3.96         | 5.2          | 3.48         | 3.23         | 12.97        | 5.31         |
|     | NAO | 4.13         | <b>6.44</b>  | 2.44        | 4.03         | 4.88         | 2.1          | 7.18         | <b>13.34</b> | <b>13.87</b> |
|     | PDO | 3.48         | 3.87         | 3.23        | 3.5          | 4.13         | 3.27         | <b>12.36</b> | 11.17        | 6.7          |
|     | PNA | 5.05         | 6.27         | 2.86        | 9.13         | <b>11.33</b> | 3.78         | 9.97         | 7.17         | 3.23         |
| YGP | AMO | 4.67         | <b>5.94</b>  | 2.99        | <b>9.15</b>  | <b>9.03</b>  | <b>8.65</b>  | 6.5          | 4.1          | 4.92         |
|     | AO  | <b>7.08</b>  | 5.74         | <b>6.09</b> | 6.19         | 5.87         | 5.79         | 3.79         | 8.11         | <b>8.33</b>  |
|     | MEI | 3.24         | 4.06         | 4.57        | 3.18         | 3.63         | 3.4          | 4.48         | 6.45         | 6.21         |
|     | NAO | 4.53         | 4.46         | 2.97        | 4.35         | 5.01         | 3.41         | 4.13         | 9.06         | 7.42         |
|     | PDO | 5.55         | 5.31         | 4.52        | 4.96         | 5.74         | 3.39         | <b>6.62</b>  | <b>6.96</b>  | 7.88         |
|     | PNA | 6.15         | 4.41         | <b>9.15</b> | 7.47         | 5.62         | 7.24         | 3.05         | 5.71         | 0.74         |

Entries in bold indicate the factor with the highest PASC.

**Table S8.** Percentage area of significant coherence (PASC) in multi-wavelet coherence between anomaly of the monthly averaged GST-, SAT-, and SATD-related indexes and large-scale indexes from 1980 to 2019 in three subareas.

|     |         | Maximum temperature |          | Mean temperature |          | Minimum temperature |          |
|-----|---------|---------------------|----------|------------------|----------|---------------------|----------|
|     |         | Combination         | PASC (%) | Combination      | PASC (%) | Combination         | PASC (%) |
| GST |         | AMO                 | 13.92    | AMO              | 9.09     | AMO                 | 9.18     |
|     |         | AMO+NAO             | 17.56    | AMO+MEI          | 16.20    | AMO+PDO             | 25.09    |
|     |         | AMO+NAO+PNA         | 16.94    | AMO+MEI+NAO      | 15.88    | AMO+PDO+NAO         | 21.66    |
|     |         | AMO+NAO+PNA+MEI     | 16.44    | AMO+MEI+NAO+PDO  | 14.20    | AMO+PDO+NAO+PNA     | 16.64    |
|     |         | AMO                 | 12.39    | AMO              | 13.69    | AMO                 | 14.78    |
| HD  | SAT     | AMO+MEI             | 12.89    | AMO+AO           | 16.20    | AMO+PDO             | 18.89    |
|     |         | AMO+MEI+AO          | 13.45    | AMO+AO+MEI       | 14.53    | AMO+PDO+MEI         | 15.86    |
|     |         | AMO+MEI+AO+NAO      | 10.62    | AMO+AO+MEI+NAO   | 13.24    | AMO+PDO+MEI+NAO     | 14.05    |
|     |         | AMO                 | 15.42    | MEI              | 18.39    | AMO                 | 11.13    |
|     |         | AMO+NAO             | 18.00    | MEI+AO           | 17.82    | AMO+NAO             | 20.08    |
| D   |         | AMO+NAO+MEI         | 16.81    | MEI+AO+PDO       | 15.32    | AMO+NAO+PDO         | 17.29    |
|     |         | AMO+NAO+MEI+PDO     | 15.18    | MEI+AO+PDO+NAO   | 15.00    | AMO+NAO+PDO+PNA     | 15.97    |
|     |         | NAO                 | 6.44     | AMO              | 15.02    | AMO                 | 6.44     |
|     | YGP GST | NAO+AO              | 8.72     | AMO+NAO          | 12.14    | AMO+PDO             | 20.21    |
|     |         | NAO+AO+PNA          | 8.27     | AMO+NAO+PNA      | 10.80    | AMO+PDO+NAO         | 16.17    |



|         |                 |       |                 |       |                 |       |
|---------|-----------------|-------|-----------------|-------|-----------------|-------|
|         | NAO+AO+PNA+PDO  | 8.19  | AMO+NAO+PNA+AO  | 10.94 | AMO+PDO+NAO+PNA | 13.65 |
|         | PNA             | 11.33 | AMO             | 10.09 | AMO             | 9.73  |
| SAT     | PNA+AMO         | 9.32  | AMO+NAO         | 12.74 | AMO+NAO         | 11.55 |
|         | PNA+AMO+MEI     | 6.78  | AMO+NAO+MEI     | 10.80 | AMO+NAO+PDO     | 10.85 |
|         | PNA+AMO+MEI+NAO | 6.87  | AMO+NAO+MEI+PNA | 10.71 | AMO+NAO+PDO+MEI | 9.35  |
|         | PDO             | 12.36 | NAO             | 13.87 | NAO             | 13.34 |
| SAT     | PDO+PNA         | 14.02 | NAO+MEI         | 13.36 | NAO+PDO         | 19.39 |
| D       | PDO+PNA+AO      | 9.01  | NAO+MEI+AO      | 12.33 | NAO+PDO+AMO     | 17.39 |
|         | PDO+PNA+AO+NAO  | 7.56  | NAO+MEI+AO+PNA  | 10.34 | NAO+PDO+AMO+AO  | 15.44 |
|         | AMO             | 5.94  | AO              | 7.08  | PNA             | 9.15  |
| GST     | AMO+PDO         | 10.70 | AO+PNA          | 11.97 | PNA+AMO         | 13.67 |
|         | AMO+PDO+MEI     | 6.54  | AO+PNA+AMO      | 9.69  | PNA+AMO+AO      | 12.50 |
|         | AMO+PDO+MEI+AO  | 6.08  | AO+PNA+AMO+MEI  | 7.85  | PNA+AMO+AO+MEI  | 11.54 |
|         | AMO             | 9.03  | AMO             | 9.15  | AMO             | 8.65  |
| SCB SAT | AMO+PDO         | 11.34 | AMO+PNA         | 11.43 | AMO+AO          | 12.68 |
|         | AMO+PDO+NAO     | 11.16 | AMO+PNA+AO      | 10.77 | AMO+AO+PNA      | 11.53 |
|         | AMO+PDO+NAO+PNA | 10.05 | AMO+PNA+AO+PDO  | 10.88 | AMO+AO+PNA+NAO  | 10.00 |
|         | PDO             | 6.62  | AO              | 8.33  | NAO             | 9.06  |
| SAT     | PDO+AMO         | 9.25  | AO+NAO          | 10.49 | NAO+AMO         | 16.59 |
| D       | PDO+AMO+MEI     | 7.73  | AO+NAO+PDO      | 9.08  | NAO+AMO+MEI     | 14.55 |
|         | PDO+AMO+MEI+PNA | 7.02  | AO+NAO+PDO+PNA  | 7.43  | NAO+AMO+MEI+PNA | 13.60 |
